# Supplementary material for: Moderate weight change following diabetes diagnosis and 10 year incidence of cardiovascular disease and mortality
Source: Springer Nature journal article supplement (doi:10.1007/s00125-019-4886-1), 2019-05-07
Supplement: MOESM1 [file 16705880]

Electronic Supplementary Tables

ESM Table 1. Cohort characteristics and measured CVD risk factors among adults with type 2 diabetes at time of diagnosis (baseline), 1 year, and 5 years. ADDITION-Cambridge (N=725) 2002-2014

| Cohort characteristics              | Female (n=279) |                |                | Male (n=446)   |                |                |
|-------------------------------------|----------------|----------------|----------------|----------------|----------------|----------------|
|                                     | Baseline       | 1 year         | 5 years        | Baseline       | 1 year         | 5 years        |
| BMI (kg/m <sup>2</sup> ), mean (SD) | 34.6 (5.9)     | 33.0 (5.9)     | 32.9 (5.8)     | 32.6 (5.3)     | 31.7 (5.1)     | 31.6 (5.0)     |
| N (%) missing                       | 1 (0.4%)       | 0 (0.0%)       | 23 (8.2%)      | 0 (0.0%)       | 0 (0.0%)       | 69 (15.5%)     |
| Weight (kg), mean (SD)              | 88.3 (16.0)    | 84.1 (15.9)    | 83.1 (15.6)    | 98.6 (17.4)    | 95.4 (16.8)    | 95.0 (16.9)    |
| N (%) missing                       | 0 (0.0%)       | 0 (0.0%)       | 15 (5.4%)      | 0 (0.0%)       | 0 (0.0%)       | 38 (8.5%)      |
| Smoking, N (%)                      |                |                |                |                |                |                |
| Current                             | 37 (13.3%)     | 31 (11.3%)     | 20 (8.4%)      | 83 (18.6%)     | 75 (17.0%)     | 51 (14.1%)     |
| Former                              | 104 (37.3%)    | 107 (38.9%)    | 92 (38.8%)     | 233 (52.2%)    | 236 (53.6%)    | 194 (53.6%)    |
| Never                               | 138 (49.5)     | 137 (49.8%)    | 125 (52.7%)    | 130 (29.2%)    | 129 (29.3%)    | 117 (32.3%)    |
| N (%) missing                       | 0 (0.0%)       | 4 (1.4%)       | 42 (15.1%)     | 0 (0.0%)       | 6 (1.3%)       | 84 (18.8)      |
| Alcohol                             |                |                |                |                |                |                |
| Mean units/week (SD)                | 3.6 (6.1)      | 3.0 (5.1)      | 3.2 (5.5)      | 9.9 (12.2)     | 8.9 (11.3)     | 7.0 (9.4)      |
| N (%) missing                       | 7 (2.5%)       | 8 (2.9%)       | 30 (10.8%)     | 4 (0.9%)       | 9 (2.0%)       | 67 (15.0%)     |
| CVD Risk Factors                    | Baseline       | 1 year         | 5 years        | Baseline       | 1 year         | 5 years        |
| HbA <sub>1c</sub> , median (Q1, Q3) |                |                |                |                |                |                |
| %                                   | 6.7 (6.3, 7.5) | 6.4 (6.0, 6.8) | 6.8 (6.4, 7.3) | 6.8 (6.2, 7.9) | 6.4 (5.9, 6.9) | 6.9 (6.4, 7.5) |
| mmol/mol                            | 50 (45, 58)    | 46 (42, 51)    | 51 (46, 56)    | 51 (44, 63)    | 46 (41, 52)    | 52 (46, 58)    |
| N (%) missing                       | 10 (3.6%)      | 5 (1.8%)       | 17 (6.1%)      | 8 (1.8%)       | 5 (1.1%)       | 44 (9.9%)      |
| Blood pressure (mmHg)               |                |                |                |                |                |                |
| Systolic                            | 139.3 (19.6)   | 132.9 (18.4)   | 132.9 (15.7)   | 143.0 (19.6)   | 138.1 (18.0)   | 136.3 (15.8)   |
| Diastolic                           | 79.2 (8.9)     | 76.5 (8.7)     | 73.6 (9.4)     | 83.3 (10.8)    | 80.1 (9.8)     | 76.4 (9.7)     |
| N (%) missing                       | 2 (0.7%)       | 2 (0.7%)       | 16 (5.7%)      | 0 (0.0%)       | 0 (0.0%)       | 35 (7.8%)      |
| Lipids (mmol/l)                     |                |                |                |                |                |                |
| Total cholesterol                   | 5.6 (1.1)      | 4.5 (0.9)      | 4.4 (0.9)      | 5.3 (1.1)      | 4.4 (1.0)      | 4.0 (0.8)      |
| N (%) missing                       | 8 (2.9%)       | 1 (0.4%)       | 17 (6.1%)      | 7 (1.6%)       | 2 (0.4%)       | 42 (9.4%)      |

|                                     |                |                |                |                |                |                |
|-------------------------------------|----------------|----------------|----------------|----------------|----------------|----------------|
| HDL                                 | 1.3 (0.3)      | 1.4 (0.3)      | 1.5 (0.3)      | 1.1 (0.3)      | 1.1 (0.3)      | 1.2 (0.3)      |
| N (%) missing                       | 8 (2.9%)       | 1 (0.4%)       | 22 (7.9%)      | 7 (1.6%)       | 2 (0.4%)       | 52 (11.7%)     |
| Triacylglycerols, median (Q1, Q3)   | 1.7 (1.2, 2.4) | 1.6 (1.2, 2.2) | 1.6 (1.1, 2.2) | 1.8 (1.3, 2.6) | 1.6 (1.2, 2.4) | 1.7 (1.2, 2.4) |
| N (%) missing                       | 8 (2.9%)       | 1 (0.4%)       | 21 (7.5%)      | 7 (1.6%)       | 2 (0.4%)       | 48 (10.8%)     |
| Self-reported medication use, N (%) | Baseline       | 1 year         | 5 years        | Baseline       | 1 year         | 5 years        |
| Glucose-lowering                    |                |                |                |                |                |                |
| Yes                                 | 1 (0.4%)       | 78 (28.8%)     | 155 (55.6%)    | 1 (0.2%)       | 138 (31.8%)    | 261 (58.5%)    |
| No                                  | 278 (99.6%)    | 193 (71.2%)    | 124 (44.4%)    | 445 (99.8%)    | 296 (68.2%)    | 185 (41.5%)    |
| Missing                             | 0 (0.0%)       | 8 (2.9%)       | 0 (0.0%)       | 0 (0.0%)       | 12 (2.7%)      | 0 (0.0%)       |
| Antihypertensive                    |                |                |                |                |                |                |
| Yes                                 | 178 (63.8%)    | 198 (73.1%)    | 208 (74.6%)    | 236 (52.9%)    | 287 (66.1%)    | 316 (70.9%)    |
| No                                  | 101 (36.2%)    | 73 (26.9%)     | 71 (25.4%)     | 210 (47.1%)    | 147 (33.9%)    | 130 (29.1%)    |
| Missing                             | 0 (0.0%)       | 8 (2.9%)       | 0 (0.0%)       | 0 (0.0%)       | 12 (2.7%)      | 0 (0.0%)       |
| Lipid-lowering                      |                |                |                |                |                |                |
| Yes                                 | 56 (20.1%)     | 178 (65.7%)    | 221 (79.2%)    | 117 (26.2%)    | 284 (65.4%)    | 336 (75.3%)    |
| No                                  | 223 (79.9%)    | 93 (34.3%)     | 58 (20.8%)     | 329 (73.8%)    | 150 (34.6%)    | 110 (24.7%)    |
| Missing                             | 0 (0.0%)       | 8 (2.9%)       | 0 (0.0%)       | 0 (0.0%)       | 12 (2.7%)      | 0 (0.0%)       |

BMI: body mass index (kg/m<sup>2</sup>). CVD: cardiovascular disease. HbA<sub>1c</sub>: glycated haemoglobin A<sub>1c</sub>. HDL: high-density lipoprotein. mmHg: millimetre of mercury. Q1, Q3: quartile 1, quartile 3. SD: Standard deviation.

ESM Table 2. Weight at 1 year and 5 years following diabetes diagnosis, stratified by weight change during the year following diabetes diagnosis. ADDITION-Cambridge (N=725) 2002-2014.

| Weight change category  | BMI (mean (SD)) |            |            | Weight, kg (mean (SD)) |             |             |
|-------------------------|-----------------|------------|------------|------------------------|-------------|-------------|
|                         | Baseline        | 1 year     | 5 years    | Baseline               | 1 year      | 5 years     |
| Gained >2%              | 32.3 (6.3)      | 33.8 (6.5) | 33.3 (6.0) | 91.4 (18.6)            | 95.7 (18.8) | 93.4 (18.2) |
| Maintained <sup>a</sup> | 32.8 (5.4)      | 32.8 (5.4) | 32.1 (5.1) | 94.3 (17.5)            | 94.0 (17.5) | 91.9 (17.3) |
| Lost ≥2 to < 5%         | 33.4 (5.4)      | 32.4 (5.2) | 32.2 (5.3) | 95.0 (16.1)            | 91.9 (15.6) | 90.3 (15.8) |
| Lost ≥5 to <10%         | 34.1 (5.1)      | 31.8 (4.7) | 32.2 (5.2) | 96.1 (16.8)            | 89.3 (15.6) | 90.0 (17.5) |
| Lost ≥10%               | 34.2 (6.2)      | 29.7 (5.3) | 30.8 (5.7) | 94.9 (20.0)            | 81.7 (17.3) | 85.0 (18.2) |

BMI: Body mass index (kg/m<sup>2</sup>). SD: Standard deviation.

<sup>a</sup>Defined as ≤2% gain or <2% loss at 1 year.

ESM Table 3. Characteristics among study participants with missing (N=137) and nonmissing (N=730) information on weight. *ADDITION-Cambridge* 2002-2014

| Covariate measured at baseline, except where noted | Missing weight at baseline or 1 year (N=137) | Not missing weight (N=730) | Risk ratio <sup>a</sup> (missing=1) |
|----------------------------------------------------|----------------------------------------------|----------------------------|-------------------------------------|
| Age (years), mean (SD)                             | 61.1 (7.5)                                   | 61.1 (7.1)                 | 1.00 (0.98, 1.02)                   |
| Gender (n)                                         |                                              |                            |                                     |
| Male                                               | 82                                           | 448                        | 0.95 (0.69, 1.30)                   |
| Female                                             | 55                                           | 282                        | 1                                   |
| Missing                                            | 0                                            | 0                          |                                     |
| Occupational class (n)                             |                                              |                            |                                     |
| Professional                                       | 31                                           | 247                        | ref                                 |
| Skilled                                            | 32                                           | 165                        | 1.46 (0.92, 2.31)                   |
| Unskilled                                          | 70                                           | 302                        | 1.69 (1.14, 2.50)                   |
| Missing                                            | 4                                            | 16                         |                                     |
| Ethnicity (n)                                      |                                              |                            |                                     |
| White                                              | 132                                          | 706                        | 1                                   |
| Black                                              | 1                                            | 3                          | 1.59 (0.29, 8.73)                   |
| Asian                                              | 3                                            | 20                         | 0.83 (0.28, 2.41)                   |
| Missing                                            | 1                                            | 1                          |                                     |
| Smoking at baseline (n)                            |                                              |                            |                                     |
| Current                                            | 34                                           | 123                        | 1                                   |
| Former                                             | 60                                           | 339                        | 0.69 (0.48, 1.10)                   |
| Never                                              | 62                                           | 268                        | 0.63 (0.42, 0.94)                   |
| Missing                                            | 1                                            | 0                          |                                     |
| Alcohol units/week, mean (SD)                      | 8.6 (14.8)                                   | 7.5 (10.8)                 | 1.01 (0.99, 1.02)                   |
| BMI (kg/m <sup>2</sup> ), mean (SD)                | 33.9 (6.3)                                   | 33.4 (5.6)                 | 1.01 (0.98, 1.04)                   |
| Weight (kg), mean (SD)                             | 93.6 (19.2)                                  | 94.6 (17.5)                | 1.00 (0.99, 1.01)                   |
| Treatment Group (n)                                |                                              |                            |                                     |
| Routine care                                       | 59                                           | 356                        | 1                                   |
| Intensive treatment                                | 78                                           | 374                        | 1.21 (0.89, 1.66)                   |
| All-cause mortality at 10 years (n)                | 38                                           | 99                         | 2.05 (1.48, 2.83)                   |
| CVD incidence at 10 years (n)                      | 22                                           | 104                        | 1.06 (0.69, 1.64)                   |

|                                                |              |              |                   |
|------------------------------------------------|--------------|--------------|-------------------|
| Type of event at 10 years (n)                  |              |              |                   |
| CVD death                                      | 10           | 21           | 1                 |
| MI                                             | 2            | 19           | 0.34 (0.08, 1.42) |
| Stroke                                         | 6            | 27           | 0.58 (0.23, 1.47) |
| Revascularization                              | 4            | 36           | 0.36 (0.12, 1.09) |
| Amputation                                     | 0            | 1            | n/a               |
| HbA <sub>1c</sub> (%) at baseline, mean (SD)   | 7.3 (1.7)    | 7.3 (1.7)    | 1.00 (0.92, 1.10) |
| HbA <sub>1c</sub> (mmol/mol) at baseline, mean | 56.3         | 56.3         | 1.00 (0.92, 1.10) |
| Blood pressure (mmHg), mean (SD)               |              |              |                   |
| Systolic                                       | 143.2 (21.4) | 141.8 (19.9) | 1.00 (1.00, 1.01) |
| Diastolic                                      | 81.6 (11.3)  | 81.7 (10.3)  | 1.00 (0.98, 1.01) |
| Lipids (mmol/l), mean (SD)                     |              |              |                   |
| Total cholesterol                              | 5.4 (1.2)    | 5.4 (1.1)    | 0.98 (0.85, 1.12) |
| LDL                                            | 3.3 (1.1)    | 3.3 (1.0)    | 1.01 (0.86, 1.19) |
| HDL                                            | 1.2 (0.4)    | 1.2 (0.3)    | 1.16 (0.74, 1.82) |
| Triacylglycerols                               | 2.1 (2.0)    | 2.1 (1.5)    | 0.98 (0.88, 1.10) |

<sup>a</sup>Associations between each predictor and a binary variable for missing weight value at baseline or 1 year (yes/no) were modelled using log binomial regression

ESM Table 4. Hazard ratios for the associations of change in weight in the year following diabetes diagnosis and 10-year incidence of CVD and mortality, adjusting for weight change from year 1 to year 5. *ADDITION-Cambridge* (N=725) 2002-2014

| Weight change           | 10-year CVD incidence          |                          | 10-year all-cause mortality    |                          |
|-------------------------|--------------------------------|--------------------------|--------------------------------|--------------------------|
|                         | N Cases/<br>Total <sup>a</sup> | HR <sup>b</sup> [95% CI] | N Cases/<br>Total <sup>a</sup> | HR <sup>b</sup> [95% CI] |
| Gained >2%              | 4/68                           | 0.32 [0.11, 0.92]        | 8/68                           | 1.41 [0.60, 3.28]        |
| Maintained <sup>c</sup> | 34/157                         | 1                        | 14/191                         | 1                        |
| Lost ≥2 to < 5%         | 23/164                         | 0.89 [0.48, 1.65]        | 16/164                         | 1.31 [0.65, 2.64]        |
| Lost ≥5%                | 17/215                         | 0.48 [0.25, 0.89]        | 20/215                         | 1.17 [0.53, 2.60]        |

<sup>a</sup>Sample size where weight change, age, sex, baseline socioeconomic class, baseline BMI, smoking at 1 year, use of anti-hypertensive, lipid- or glucose-lowering medication at 1 year, and weight at 5 years are all non-missing

<sup>b</sup>Adjusted for age, sex, baseline socioeconomic class, baseline BMI, smoking at 1 year, weight change from year 1 to year 5, use of anti-hypertensive, lipid- or glucose-lowering medication at 1 year, and trial arm

<sup>c</sup>Defined as ≤2% gain or <2% loss at 1 year

ESM Table 5. Hazard ratios for the associations of change in weight in the year following diabetes diagnosis and 10 year incidence of CVD and mortality, with multiple imputation of missing information. ADDITION-Cambridge 2002-2014

| Full cohort             |                                |                         |                                |                         |
|-------------------------|--------------------------------|-------------------------|--------------------------------|-------------------------|
|                         | 10-year CVD incidence          |                         | 10-year all-cause mortality    |                         |
| Weight change           | N cases/<br>Total <sup>a</sup> | HR <sup>b</sup> [95%CI] | N cases/<br>Total <sup>a</sup> | HR <sup>b</sup> [95%CI] |
| Gained >2%              | 6/75                           | 0.39 [0.17, 0.93]       | 13/75                          | 1.79 [0.86, 3.72]       |
| Maintained <sup>c</sup> | 40/210                         | 1                       | 23/210                         | 1                       |
| Lost ≥2 to < 5%         | 26/173                         | 0.76 [0.46, 1.24]       | 22/172                         | 1.16 [0.64, 2.11]       |
| Lost ≥5%                | 22/229                         | 0.51 [0.30, 0.86]       | 30/228                         | 1.28 [0.72, 2.26]       |
| Age ≥65 years           |                                |                         |                                |                         |
|                         | 10-year CVD incidence          |                         | 10-year all-cause mortality    |                         |
| Gained >2%              | 4/21                           | 0.50 [0.16, 1.55]       | 8/25                           | 2.13 [0.82, 5.53]       |
| Maintained <sup>c</sup> | 20/75                          | 1                       | 14/75                          | 1                       |
| Lost ≥2 to < 5%         | 15/71                          | 0.82 [0.42, 1.59]       | 17/70                          | 1.47 [0.71, 3.03]       |
| Lost ≥5%                | 7/77                           | 0.39 [0.17, 0.90]       | 14/77                          | 1.31 [0.64, 2.70]       |

95% CI: 95% confidence interval. CVD: Cardiovascular disease. HR: Hazard ratio.

<sup>a</sup>Sample size where weight change, age, sex, baseline socioeconomic class, baseline BMI, smoking at 1 year, use of anti-hypertensive, lipid- or glucose-lowering medication at 1 year are all non-missing, prior to multiple imputation of missing information

<sup>b</sup>Adjusted for age, sex, baseline socioeconomic class, baseline BMI, smoking at 1 year, use of anti-hypertensive, lipid- or glucose-lowering medication at 1 year, and trial arm

<sup>c</sup>Defined as ≤2% gain or <2% loss at 1 year

ESM Table 6. Hazard ratios for the associations of change in weight in the year following diabetes diagnosis and 10-year incidence of CVD and mortality, among participants without self-reported myocardial infarction or stroke prior to diabetes diagnosis. *ADDITION-Cambridge* (N=648) 2002-2014

| Weight change           | 10-year CVD incidence          |                          | 10-year all-cause mortality    |                          |
|-------------------------|--------------------------------|--------------------------|--------------------------------|--------------------------|
|                         | N Cases/<br>Total <sup>a</sup> | HR <sup>b</sup> [95% CI] | N Cases/<br>Total <sup>a</sup> | HR <sup>b</sup> [95% CI] |
| Gained >2%              | 3/64                           | 0.23 [0.05, 1.15]        | 8/64                           | 1.24 [0.52, 2.96]        |
| Maintained <sup>c</sup> | 33/183                         | 1                        | 19/183                         | 1                        |
| Lost ≥2 to < 5%         | 23/155                         | 0.80 [0.44, 1.48]        | 16/155                         | 1.07 [0.55, 2.11]        |
| Lost ≥5%                | 15/212                         | 0.40 [0.23, 0.70]        | 25/212                         | 1.17 [0.55, 2.46]        |

95% CI: 95% confidence interval. CVD: Cardiovascular disease. HR: Hazard ratio.

<sup>a</sup>Sample size where weight change, age, sex, baseline socioeconomic class, baseline BMI, smoking at 1 year, use of anti-hypertensive, lipid- or glucose-lowering medication at 1 year are all non-missing

<sup>b</sup>Adjusted for age, sex, baseline BMI, smoking at 1 year, socioeconomic class, use of anti-hypertensive, lipid- or glucose-lowering medication at 1 year, and trial arm

<sup>c</sup>Defined as ≤2% gain or <2% loss at 1 year.

ESM Table 7. Hazard ratios for the association of change in weight in the year following diabetes diagnosis and 10-year incidence of myocardial infarction, stroke, and CVD death. *ADDITION-Cambridge 2002-2014*

| Weight change           | N Cases/ Total <sup>a</sup> | HR <sup>b</sup> [95% CI] |
|-------------------------|-----------------------------|--------------------------|
| Gained >2%              | 4/71                        | 0.39 [0.10, 1.52]        |
| Maintained <sup>c</sup> | 25/185                      | 1                        |
| Lost $\geq 2$ to < 5%   | 15/158                      | 0.74 [0.35, 1.57]        |
| Lost $\geq 5\%$         | 14/215                      | 0.51 [0.27, 0.96]        |

<sup>a</sup>Sample size where weight change, age, sex, baseline socioeconomic class, baseline body mass index, smoking at 1 year, use of anti-hypertensive, lipid- or glucose-lowering medication at 1 year, are all non-missing

<sup>b</sup>Hazard ratio adjusted for age, sex, baseline socioeconomic class, baseline body mass index, smoking at 1 year, use of anti-hypertensive, lipid- or glucose-lowering medication at 1 year, and trial arm

<sup>c</sup>Defined as  $\leq 2\%$  gain or  $< 2\%$  loss at 1 year.

ESM Table 8. Subdistribution hazard ratios for the association of change in weight in the year following diabetes diagnosis and 10-year incidence of CVD. *ADDITION-Cambridge* 2002-2014

| Weight change           | N Cases/ Total <sup>a</sup> | sHR <sup>b</sup> [95% CI] |
|-------------------------|-----------------------------|---------------------------|
| Gained >2%              | 6/75                        | 0.41 [0.16, 1.03]         |
| Maintained <sup>c</sup> | 40/210                      | 1                         |
| Lost ≥2 to < 5%         | 26/173                      | 0.78 [0.47, 1.30]         |
| Lost ≥5%                | 22/229                      | 0.54 [0.31, 0.93]         |

<sup>a</sup>Sample size where weight change, age, sex, baseline socioeconomic class, baseline body mass index, smoking at 1 year, use of anti-hypertensive, lipid- or glucose-lowering medication at 1 year, are all non-missing

<sup>b</sup>Subdistribution hazard ratio adjusted for age, sex, baseline socioeconomic class, baseline body mass index, smoking at 1 year, use of anti-hypertensive, lipid- or glucose-lowering medication at 1 year, and trial arm

<sup>c</sup>Defined as ≤2% gain or <2% loss at 1 year.

ESM Table 9. Beta coefficients from multivariable linear regression models of the associations of change in weight in the year following diabetes diagnosis and CVD risk factors measured 1 and 5 years after diagnosis, with multiple imputation of missing information. *ADDITION-Cambridge 2002-2014*

|                                    | Risk factors measured at 1 year | Risk factors measured at 5 years |
|------------------------------------|---------------------------------|----------------------------------|
|                                    | $\beta^a$ [95% CI]              | $\beta^a$ [95% CI]               |
| <b>HbA<sub>1c</sub> (mmol/mol)</b> |                                 |                                  |
| Gained >2%                         | 2.19 [-0.37, 4.74]              | -0.73 [-3.74, 2.27]              |
| Maintained <sup>b</sup>            | 0                               | 0                                |
| Lost $\geq$ 2% to <5%              | -2.18 [-4.00, -0.35]            | -1.39 [-3.75, 0.98]              |
| Lost $\geq$ 5% to <10%             | -4.83 [-6.83, -2.83]            | -1.11 [-3.79, 1.58]              |
| Lost $\geq$ 10%                    | -6.87 [-9.31, -4.43]            | -3.57 [-6.46, -0.67]             |
| <b>Systolic BP (mmHg)</b>          |                                 |                                  |
| Gained >2%                         | 1.29 [0.24,2.35]                | -1.11 [-2.00,-0.22]              |
| Maintained <sup>b</sup>            | 0                               | 0                                |
| Lost $\geq$ 2 to < 5%              | -3.06 [-3.86,-2.25]             | -1.76 [-2.42,-1.09]              |
| Lost $\geq$ 5 to <10%              | -1.93 [-2.80,-1.05]             | 1.20 [0.47,1.93]                 |
| Lost $\geq$ 10%                    | -2.99 [-3.96,-2.02]             | -1.95 [-2.76,-1.14]              |
| <b>Diastolic BP (mmHg)</b>         |                                 |                                  |
| Gained >2%                         | 0.05 [-0.49,0.59]               | -0.47 [-1.00,0.06]               |
| Maintained <sup>b</sup>            | 0                               | 0                                |
| Lost $\geq$ 2 to < 5%              | -1.08 [-1.49,-0.66]             | -0.33 [-0.72,0.07]               |
| Lost $\geq$ 5 to <10%              | -1.93 [-2.38,-1.48]             | -0.39 [-0.83,0.04]               |
| Lost $\geq$ 10%                    | -2.88 [-3.37,-2.38]             | -1.86 [-2.34,-1.38]              |
| <b>Total Cholesterol (mmol/l)</b>  |                                 |                                  |
| Gained >2%                         | -0.27 [-0.32,-0.22]             | -0.11 [-0.15,-0.06]              |
| Maintained <sup>b</sup>            | 0                               | 0                                |
| Lost $\geq$ 2 to < 5%              | -0.08 [-0.12,-0.04]             | -0.16 [-0.19,-0.12]              |
| Lost $\geq$ 5 to <10%              | -0.20 [-0.25,-0.16]             | -0.13 [-0.17,-0.09]              |
| Lost $\geq$ 10%                    | -0.28 [-0.32,-0.23]             | -0.17 [-0.21,-0.13]              |
| <b>LDL (mmol/l)</b>                |                                 |                                  |
| Gained >2%                         | -0.22 [-0.42,-0.02]             | -0.05 [-0.25,0.15]               |

|                                         |                     |                     |
|-----------------------------------------|---------------------|---------------------|
| Maintained <sup>b</sup>                 | 0                   | 0                   |
| Lost $\geq 2$ to $< 5\%$                | -0.05 [-0.20,0.09]  | -0.19 [-0.33,-0.06] |
| Lost $\geq 5$ to $< 10\%$               | -0.09 [-0.25,0.08]  | -0.11 [-0.26,0.04]  |
| Lost $\geq 10\%$                        | -0.12 [-0.28,0.05]  | -0.14 [-0.31,0.03]  |
| Triacylglycerols <sup>c</sup> (mmol /l) |                     |                     |
| Gained $> 2\%$                          | -0.29 [-0.37,-0.22] | -0.29 [-0.34,-0.23] |
| Maintained <sup>b</sup>                 | 0                   | 0                   |
| Lost $\geq 2$ to $< 5\%$                | -0.31 [-0.37,-0.25] | -0.12 [-0.17,-0.08] |
| Lost $\geq 5$ to $< 10\%$               | -0.49 [-0.56,-0.43] | -0.14 [-0.19,-0.09] |
| Lost $\geq 10\%$                        | -0.84 [-0.91,-0.77] | -0.43 [-0.48,-0.38] |

95% CI: 95% confidence interval. BP: Blood pressure. CVD: Cardiovascular disease. HbA<sub>1c</sub>: Glycated haemoglobin A<sub>1c</sub>. HDL: High-density lipoprotein. LDL: Low-density lipoprotein.

<sup>a</sup>Beta coefficients are from linear regression models adjusted for age, sex, baseline BMI, smoking, relevant medication use, and trial arm.

<sup>b</sup>Defined as  $\leq 2\%$  gain or  $< 2\%$  loss at 1 year.

<sup>c</sup>Natural log of triacylglycerols.

ESM Table 10. Beta coefficients and 95% confidence intervals for the associations of weight change in the year following diabetes diagnosis and CVD risk factors at one and 5 years after diagnosis, adjusting for baseline risk factors. *ADDITION-Cambridge* (N=725) 2002-2014.

| Risk factor                        | Risk factors measured at 1 year |                      | Risk factors measured at 5 years |                      |
|------------------------------------|---------------------------------|----------------------|----------------------------------|----------------------|
|                                    | N                               | $\beta^a$ (95% CI)   | N                                | $\beta^a$ (95% CI)   |
| <b>HbA<sub>1c</sub> (mmol/mol)</b> |                                 |                      |                                  |                      |
| Gained >2%                         | 70                              | 1.04 [-1.49, 3.56]   | 72                               | -1.48 [-4.15, 1.18]  |
| Maintained <sup>b</sup>            | 176                             | 0                    | 187                              | 0                    |
| Lost $\geq$ 2% to <5%              | 159                             | -1.68 [-3.62, 0.26]  | 165                              | -1.27 [-3.43, 0.90]  |
| Lost $\geq$ 5% to <10%             | 124                             | -4.81 [-6.41, -3.21] | 127                              | -1.03 [-3.72, 1.66]  |
| Lost $\geq$ 10%                    | 92                              | -6.42 [-8.76, -4.08] | 94                               | -3.59 [-6.04, -1.15] |
| <b>Systolic BP</b>                 |                                 |                      |                                  |                      |
| Gained >2%                         | 70                              | 1.80 [-3.73,7.33]    | 72                               | -0.87 [-5.20,3.46]   |
| Maintained <sup>b</sup>            | 189                             | 0                    | 203                              | 0                    |
| Lost $\geq$ 2 to < 5%              | 164                             | -0.64 [-3.61,2.34]   | 171                              | -0.69 [-4.37,2.99]   |
| Lost $\geq$ 5 to <10%              | 127                             | -2.73 [-6.46,1.00]   | 130                              | 0.58 [-3.23,4.39]    |
| Lost $\geq$ 10%                    | 94                              | -4.60 [-8.97,-0.25]  | 96                               | -3.78 [-8.15,0.59]   |
| <b>Diastolic BP</b>                |                                 |                      |                                  |                      |
| Gained >2%                         | 70                              | -0.09 [-2.05,1.86]   | 72                               | -0.58 [-3.67,2.50]   |
| Maintained <sup>b</sup>            | 189                             | 0                    | 203                              | 0                    |
| Lost $\geq$ 2 to < 5%              | 164                             | -0.31 [-1.73,1.11]   | 171                              | -0.26 [-2.04,1.52]   |
| Lost $\geq$ 5 to <10%              | 127                             | -2.06 [-3.54,-0.58]  | 130                              | -0.68 [-2.45,1.09]   |
| Lost $\geq$ 10%                    | 94                              | -2.97 [-4.99,-0.95]  | 96                               | -2.54 [-4.55,-0.52]  |
| <b>Total cholesterol</b>           |                                 |                      |                                  |                      |
| Gained >2%                         | 71                              | -0.26 [-0.51,0.00]   | 72                               | -0.07 [-0.24,0.11]   |
| Maintained <sup>b</sup>            | 182                             | 0                    | 194                              | 0                    |
| Lost $\geq$ 2 to < 5%              | 159                             | -0.12 [-0.27,0.03]   | 163                              | -0.18 [-0.32,-0.043] |
| Lost $\geq$ 5 to <10%              | 124                             | -0.24 [-0.45,-0.03]  | 125                              | -0.11[-0.26,0.04]    |
| Lost $\geq$ 10%                    | 93                              | -0.37 [-0.53,-0.22]  | 96                               | -0.23[-0.39,-0.08]   |
| <b>LDL</b>                         |                                 |                      |                                  |                      |
| Gained >2%                         | 67                              | -0.20[-0.42,0.01]    | 66                               | -0.03 [-0.20,0.14]   |

|                               |     |                     |     |                     |
|-------------------------------|-----|---------------------|-----|---------------------|
| Maintained <sup>b</sup>       | 167 | 0                   | 176 | 0                   |
| Lost $\geq 2$ to $< 5\%$      | 150 | -0.08[-0.21,0.04]   | 148 | 0.21 [-0.35,-0.07]  |
| Lost $\geq 5$ to $< 10\%$     | 120 | -0.10 [-0.27,0.07]  | 116 | -0.11 [-0.241,0.02] |
| Lost $\geq 10\%$              | 90  | -0.18 [-0.31,-0.04] | 99  | -0.19 [-0.33,-0.04] |
| Triacylglycerols <sup>c</sup> |     |                     |     |                     |
| Gained $> 2\%$                | 71  | -0.04 [-0.18,0.11]  | 71  | -0.12 [-0.22,-0.01] |
| Maintained <sup>b</sup>       | 181 |                     | 191 | 0                   |
| Lost $\geq 2$ to $< 5\%$      | 159 | -0.09 [-0.17,-0.02] | 161 | -0.07 [-0.15,0.01]  |
| Lost $\geq 5$ to $< 10\%$     | 124 | -0.21 [-0.30,-0.13] | 123 | -0.08 [-0.19,0.02]  |
| Lost $\geq 10\%$              | 93  | -0.41 [-0.51,-0.32] | 94  | -0.27 [-0.36,-0.18] |

95% CI: 95% confidence interval. BP: Blood pressure. CVD: Cardiovascular disease. HbA<sub>1c</sub>: Glycated haemoglobin A<sub>1c</sub>. HDL: High-density lipoprotein. LDL: Low-density lipoprotein.

<sup>a</sup>Beta coefficients are from linear regression models adjusted for age, sex, baseline BMI, smoking, relevant medication use, trial arm, and baseline value of the risk factor.

<sup>b</sup>Defined as  $\leq 2\%$  gain or  $< 2\%$  loss at 1 year.

<sup>c</sup>Natural log of triacylglycerols

ESM Table 11. Beta coefficients from multivariable linear regression models of the associations of change in weight in the year following diabetes diagnosis and CVD risk factors measured 1 and 5 years after diagnosis, by medication use. *ADDITION-Cambridge* (N=725) 2002-2014

|                                    | Stratified by relevant medication use at 1 year |                                                 |     |                                                | Stratified by relevant medication use at 5 years |                                                  |     |                                                 |
|------------------------------------|-------------------------------------------------|-------------------------------------------------|-----|------------------------------------------------|--------------------------------------------------|--------------------------------------------------|-----|-------------------------------------------------|
|                                    | N                                               | Yes medication use at 1 year $\beta^a$ [95% CI] | N   | No medication use at 1 year $\beta^a$ [95% CI] | N                                                | Yes medication use at 5 years $\beta^a$ [95% CI] | N   | No medication use at 5 years $\beta^a$ [95% CI] |
| <b>HbA<sub>1c</sub> (mmol/mol)</b> |                                                 |                                                 |     |                                                |                                                  |                                                  |     |                                                 |
| Gained >2%                         | 31                                              | 2.83 [-2.28, 7.93]                              | 39  | 1.48 [-1.61, 4.57]                             | 27                                               | 1.09 [-2.44, 4.61]                               | 37  | -2.94 [-7.17, 1.29]                             |
| Maintained <sup>b</sup>            | 62                                              | 0                                               | 123 | 0                                              | 56                                               | 0                                                | 112 | 0                                               |
| Lost $\geq$ 2% to <5%              | 60                                              | -3.30 [-6.37, -0.23]                            | 104 | -1.96 [-4.21, 0.29]                            | 56                                               | -2.51 [-5.78, 0.76]                              | 98  | 1.11 [-1.68, 3.91]                              |
| Lost $\geq$ 5% to <10%             | 41                                              | -6.81 [-9.73, -3.88]                            | 84  | -4.15 [-6.23, -2.07]                           | 38                                               | -3.39 [-7.20, 0.42]                              | 80  | 2.35 [-1.02, 5.72]                              |
| Lost $\geq$ 10%                    | 21                                              | -6.35 [-12.45, -0.24]                           | 71  | -6.15 [-8.37, -3.93]                           | 21                                               | -4.32 [-8.47, -0.16]                             | 66  | -1.03 [-3.48, 1.43]                             |
| <b>Systolic BP (mmHg)</b>          |                                                 |                                                 |     |                                                |                                                  |                                                  |     |                                                 |
| Gained >2%                         | 55                                              | 1.37 [-5.61, 8.35]                              | 15  | 2.44 [-9.68, 14.56]                            | 56                                               | 0.72 [-4.14, 5.59]                               | 16  | -9.35 [-17.59, -1.11]                           |
| Maintained <sup>b</sup>            | 136                                             | 0                                               | 53  | 0                                              | 159                                              | 0                                                | 44  | 0                                               |
| Lost $\geq$ 2 to < 5%              | 128                                             | -2.48 [-6.92, 1.96]                             | 36  | -4.41 [-10.80, 1.98]                           | 133                                              | -2.37 [-6.31, 1.57]                              | 39  | -1.92 [-7.05, 3.20]                             |
| Lost $\geq$ 5 to <10%              | 92                                              | -2.33 [-7.52, 2.86]                             | 35  | -0.46 [-7.28, 6.37]                            | 97                                               | 2.71 [-2.39, 7.81]                               | 33  | -3.29 [-10.31, 3.73]                            |
| Lost $\geq$ 10%                    | 71                                              | -3.06 [-8.31, 2.18]                             | 23  | -0.98 [-7.96, 6.00]                            | 69                                               | -0.36 [-5.14, 4.43]                              | 27  | -8.53 [-19.07, 2.00]                            |
| <b>Diastolic BP (mmHg)</b>         |                                                 |                                                 |     |                                                |                                                  |                                                  |     |                                                 |
| Gained >2%                         | 55                                              | -0.56 [-3.04, 1.93]                             | 15  | 3.05 [-2.08, 8.18]                             | 57                                               | 0.26 [-3.20, 3.73]                               | 21  | -3.07 [-8.61, 2.46]                             |
| Maintained <sup>b</sup>            | 136                                             | 0                                               | 53  | 0                                              | 162                                              | 0                                                | 60  | 0                                               |
| Lost $\geq$ 2 to < 5%              | 128                                             | -1.26 [-3.39, 0.87]                             | 36  | -0.76 [-3.67, 2.14]                            | 135                                              | -0.92 [-3.02, 1.17]                              | 46  | 0.21 [-3.80, 4.22]                              |
| Lost $\geq$ 5 to <10%              | 92                                              | -1.96 [-3.60, -0.33]                            | 35  | -1.36 [-4.74, 2.01]                            | 98                                               | -0.27 [-2.27, 1.72]                              | 40  | -1.70 [-5.98, 2.58]                             |

|                                              |     |                        |    |                        |     |                        |    |                        |
|----------------------------------------------|-----|------------------------|----|------------------------|-----|------------------------|----|------------------------|
| Lost $\geq 10\%$                             | 71  | -3.48<br>[-6.26,-0.71] | 23 | -0.53<br>[-3.49,2.43]  | 70  | -2.21<br>[-4.86,0.44]  | 33 | -2.73<br>[-7.83,2.37]  |
| <b>Total Cholesterol (mmol/l)</b>            |     |                        |    |                        |     |                        |    |                        |
| Gained $>2\%$                                | 51  | -0.32<br>[-0.58,-0.50] | 20 | -0.19<br>[-0.73,0.34]  | 62  | -0.13<br>[-0.32,0.06]  | 17 | 0.11<br>[-0.37,0.59]   |
| Maintained <sup>b</sup>                      | 122 | 0                      | 66 | 0                      | 163 | 0                      | 58 | 0                      |
| Lost $\geq 2$ to $< 5\%$                     | 128 | -0.15<br>[-0.37,0.06]  | 37 | 0.11<br>[-0.23,0.46]   | 144 | -0.17<br>[-0.32,-0.02] | 38 | -0.15<br>[-0.57,0.26]  |
| Lost $\geq 5$ to $< 10\%$                    | 94  | -0.17<br>[-0.41,0.07]  | 32 | -0.26<br>[-0.75,0.24]  | 109 | -0.06<br>[-0.26,0.14]  | 28 | -0.40<br>[-0.90,0.10]  |
| Lost $\geq 10\%$                             | 65  | -0.25<br>[-0.44,-0.05] | 28 | -0.31<br>[-0.69,0.07]  | 76  | -0.13<br>[-0.31,0.04]  | 26 | -0.29<br>[-0.81,0.23]  |
| <b>LDL (mmol/l)</b>                          |     |                        |    |                        |     |                        |    |                        |
| Gained $>2\%$                                | 51  | -0.25<br>[-0.50,0.00]  | 20 | -0.19<br>[-0.64,0.27]  | 59  | -0.03<br>[-0.25,0.18]  | 10 | 0.12<br>[-0.37,0.62]   |
| Maintained <sup>b</sup>                      | 122 | 0                      | 66 | 0                      | 154 | 0                      | 40 | 0                      |
| Lost $\geq 2$ to $< 5\%$                     | 128 | -0.08<br>[-0.26,0.10]  | 37 | 0.05 [-<br>0.30,0.41]  | 138 | -0.15<br>[-0.31,0.01]  | 30 | -0.26<br>[-0.63,0.11]  |
| Lost $\geq 5$ to $< 10\%$                    | 94  | -0.02<br>[-0.22,0.19]  | 32 | -0.17<br>[-0.57,0.23]  | 106 | -0.06<br>[-0.22,0.10]  | 19 | -0.23<br>[-0.698,0.24] |
| Lost $\geq 10\%$                             | 65  | -0.04 [-<br>0.21,0.12] | 28 | -0.16<br>[-0.51,0.18]  | 75  | -0.09 [-<br>0.27,0.09] | 19 | -0.26<br>[-0.74,0.23]  |
| <b>Triacylglycerols<sup>c</sup> (mmol/l)</b> |     |                        |    |                        |     |                        |    |                        |
| Gained $>2\%$                                | 51  | -0.08<br>[-0.26,0.11]  | 20 | -0.14<br>[-0.37,0.08]  | 61  | -0.15<br>[-0.32,0.02]  | 10 | -0.33<br>[-0.72,0.05]  |
| Maintained <sup>b</sup>                      | 122 | 0                      | 66 | 0                      | 156 | 0                      | 41 | 0                      |
| Lost $\geq 2$ to $< 5\%$                     | 128 | -0.09<br>[-0.22,0.04]  | 37 | -0.16<br>[-0.32,0.01]  | 138 | -0.08<br>[-0.21,0.05]  | 30 | -0.05<br>[-0.28,0.19]  |
| Lost $\geq 5$ to $< 10\%$                    | 94  | -0.21<br>[-0.34,-0.08] | 32 | -0.20<br>[-0.34,-0.06] | 107 | -0.05<br>[-0.23,0.12]  | 18 | -0.26<br>[-0.48,-0.05] |
| Lost $\geq 10\%$                             | 65  | -0.48<br>[-0.64,-0.32] | 28 | -0.38<br>[-0.61,-0.14] | 74  | -0.26<br>[-0.43,-0.09] | 20 | -0.34<br>[-0.55,-0.13] |

<sup>a</sup>Beta coefficients are from linear regression models adjusted for age, sex, baseline BMI, smoking, relevant medication use at 1 year or 5 years, and trial arm.

<sup>b</sup>Defined as  $\leq 2\%$  gain or  $< 2\%$  loss at 1 year.

<sup>c</sup>Natural log of triacylglycerols.
